# Supplementary material for: Folate Pathway Gene Polymorphisms, Maternal Folic Acid Use, and Risk of Childhood Acute Lymphoblastic Leukemia
Source: Oxford University Press journal article supplement (doi:10.1158/1055-9965.epi-14-0680), 2014-11-14
Supplement: 10559965epi140680-sup-133239_1_supp_2669510_nc77dl.docx [file 10559965epi140680-sup-133239_1_supp_2669510_nc77dl.docx]

1361 agreed to participate

545 returned minimum demographic data

**CONTROLS**

1067 asked for DNA

546 returned DNA collection kits

541 returned folic acid data

1027 agreed to give DNA

535 child’s final genotyping

501 mother’s final genotyping

447 father’s final genotyping

529 children for gene x folic acid analysis

496 mothers for gene x folic acid analysis

416 agreed to participate

393 returned minimum demographic data

392 child’s final genotyping

391 mother’s final genotyping

344 father’s final genotyping

**CASES**

415 children with DNA sample

414 mothers with DNA sample

361 fathers with DNA sample

(276 blood trios available)

388 returned folic acid data

387 children and mothers for gene x folic acid analysis

Supplemental Figure S1

Flow chart of data collection for the folate pathway genotype analysis in the Australian Study of the causes of Acute Lymphoblastic Leukemia in children (Aus-ALL)
