# Supplementary material for: Folate Pathway Gene Polymorphisms, Maternal Folic Acid Use, and Risk of Childhood Acute Lymphoblastic Leukemia
Source: Oxford University Press journal article supplement (doi:10.1158/1055-9965.epi-14-0680), 2014-11-14
Supplement: 10559965epi140680-sup-133239_1_supp_2669512_nct7dl.doc [file 10559965epi140680-sup-133239_1_supp_2669512_nct7dl.doc]

Supplementary Table S2: Father’s folate pathway genotypes and risk of ALL by immunophenotype and cytogenetic subtype.

|  |  | PreB-Cell | | T-Cell | | ETV6-Runx-1  t(12, 21) | | Hyperdiploidy | | Trisomy or higher 21 | |
| --- | --- | --- | --- | --- | --- | --- | --- | --- | --- | --- | --- |
| N cases |  | 309 | | 29 | | 55 | | 100 | | 56 | |
| Polymorphism | Allele | ORa | 95% CI | ORa | 95% CI | ORa | 95% CI | ORa | 95% CI | ORa | 95% CI |
| MTHFR 677 C>T | CC | 1.00 | Ref | 1.00 | Ref | 1.00 | Ref | 1.00 | Ref | 1.00 | Ref |
|  | CT | 1.38 | 0.99, 1.91 | 2.32 | 0.93,5.77 | 1.64 | 0.86, 3.12 | 1.23 | 0.77, 2.00 | 1.43 | 0.75, 2.72 |
|  | TT | 1.82 | 1.07, 3.12 | 2.51 | 0.59, 10.7 | 0.74 | 0.19, 2.91 | 0.83 | 0.31, 2.21 | 1.72 | 0.54, 5.47 |
|  | CT/TT | 1.46 | 1.07, 2.00 | 2.32 | 0.96, 5.62 | 1.45 | 0.78, 2.71 | 1.18 | 0.74, 1.88 | 1.46 | 0.79, 2.73 |
| MTHFR 1298 A>C | AA | 1.00 | Ref | 1.00 | Ref | 1.00 | Ref | 1.00 | Ref | 1.00 | Ref |
|  | AC | 1.03 | 0.74, 1.41 | 1.76 | 0.74, 4.21 | 0.76 | 0.40, 1.44 | 1.19 | 0.73, 1.94 | 1.61 | 0.84, 3.09 |
|  | CC | 1.08 | 0.56, 2.08 | 1.48 | 0.29, 7.63 | 0.82 | 0.19, 3.56 | 1.35 | 0.55, 3.31 | 1.27 | 0.37, 4.33 |
|  | AC/CC | 1.04 | 0.76, 1.41 | 1.76 | 0.76, 4.08 | 0.77 | 0.41, 1.42 | 1.24 | 0.78, 1.98 | 1.60 | 0.85, 3.01 |
| MTRR 66A>G | AA | 1.00 | Ref | 1.00 | Ref | 1.00 | Ref | 1.00 | Ref | 1.00 | Ref |
|  | AG | 0.58 | 0.38, 0.88 | 0.85 | 0.27, 2.68 | 0.64 | 0.28, 1.46 | 0.69 | 0.37, 1.29 | 0.60 | 0.26, 1.37 |
|  | GG | 0.61 | 0.38, 0.98 | 0.80 | 0.22, 2.89 | 0.82 | 0.34, 1.97 | 0.55 | 0.27, 1.14 | 0.93 | 0.38, 2.25 |
|  | AG/GG | 0.60 | 0.40, 0.89 | 0.84 | 0.28, 2.52 | 0.73 | 0.34, 1.55 | 0.64 | 0.36, 1.15 | 0.71 | 0.33, 1.53 |
| MTR 2756 A>Gb | AA | 1.00 | Ref | 1.00 | Ref | 1.00 | Ref | 1.00 | Ref | 1.00 | Ref |
|  | AG/GG | 1.06 | 0.77, 1.47 | 0.37 | 0.13, 1.02 | 1.69 | 0.90, 3.19 | 1.23 | 0.75, 2.00 | 1.15 | 0.60, 2.22 |
| MTR 5049 C>A | CC | 1.00 | Ref | 1.00 | Ref | 1.00 | Ref | 1.00 | Ref | 1.00 | Ref |
|  | CA | 1.10 | 0.78, 1.55 | 0.66 | 0.26, 1.67 | 1.08 | 0.55, 2.12 | 1.17 | 0.70, 1.97 | 0.81 | 0.42, 1.56 |
|  | AA | 1.18 | 0.71, 1.95 | 0.97 | 0.27, 3.51 | 0.68 | 0.22, 2.04 | 1.17 | 0.54, 2.56 | 0.93 | 0.33, 2.61 |
|  | CA/AA | 1.14 | 0.82, 1.57 | 0.72 | 0.31, 1.64 | 0.99 | 0.52, 1.87 | 1.19 | 0.73, 1.95 | 0.83 | 0.44, 1.56 |
| CBS 2199 T>C | TT | 1.00 | Ref | 1.00 | Ref | 1.00 | Ref | 1.00 | Ref | 1.00 | Ref |
|  | TC | 0.90 | 0.62, 1.28 | 1.03 | 0.39, 2.70 | 0.99 | 0.48, 2.04 | 0.68 | 0.40, 1.14 | 0.54 | 0.27, 1.10 |
|  | CC | 0.89 | 0.55, 1.44 | 0.50 | 0.12, 2.20 | 0.62 | 0.22, 1.72 | 0.75 | 0.38, 1.48 | 0.66 | 0.27, 1.61 |
|  | TC/CC | 0.92 | 0.65, 1.29 | 0.91 | 0.36, 2.33 | 0.91 | 0.45, 1.81 | 0.71 | 0.43, 1.16 | 0.58 | 0.30, 1.12 |
| CBS 844 Ins 68b | WTWT | 1.00 | Ref | 1.00 | Ref | 1.00 | Ref | 1.00 | Ref | 1.00 | Ref |
|  | WTIns/InsIns | 0.57 | 0.36, 0.89 | 1.31 | 0.50, 3.41 | 0.20 | 0.06, 0.71 | 0.89 | 0.48, 1.63 | 0.87 | 0.39, 1.91 |

aAll ORs adjusted for matching variables (child’s age, sex, state of residence), maternal age, child ethnicity, birth order, parental education.

btoo few homozygous variants to be analyzed separately
